# Supplementary material for: Effect of NaOH-treated sawdust incorporated in geopolymer matrix on compressive strength and adsorption property
Source: Royal Society of Chemistry journal article supplement (doi:10.1039/d4lf00176a), 2024-01-01
Supplement: d4lf00176a1.pdf [file d4lf00176a1.pdf]

## Supplementary Material

### **Effect of sodium hydroxide-treated sawdust microparticles incorporated in geopolymer matrix on compressive strength and porosity**

Gaëlle Ngnie<sup>a</sup>, Rock Ambela Atangana<sup>b</sup>, Grace Ingrid Tomou-Mbahim<sup>b</sup>, Lionel Magellan Sambang<sup>b</sup>, Gustave Kenne Dedzo<sup>b\*</sup>, Hervé Kouamo Tchakoute<sup>b\*</sup>, Claus Henning Rüscher<sup>c</sup>, Emmanuel Ngameni<sup>b</sup>

*a University Institute of Wood Technology of Mbalmayo, University of Yaoundé I, P.O. Box, 306, Mbalmayo, Cameroon.*

*b Laboratoire d'électrochimie analytique et génie des matériaux, University of Yaoundé I, P.O. Box 812, Yaoundé Cameroun*

*c Institut für Mineralogie, Leibniz Universität Hannover, Callinstrasse 3, D-30167 Hannover, Germany*

Corresponding authors

(Gustave Kenne Dedzo) [kennegusto@yahoo.fr](mailto:kennegusto@yahoo.fr)

(Hervé Kouamo Tchakoute) [htchak@yahoo.fr](mailto:htchak@yahoo.fr)

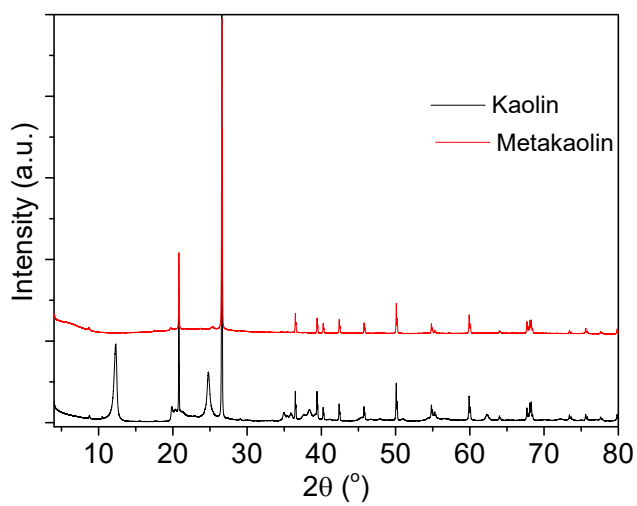

Figure S1. XRD patterns of kaolin and metakaolin

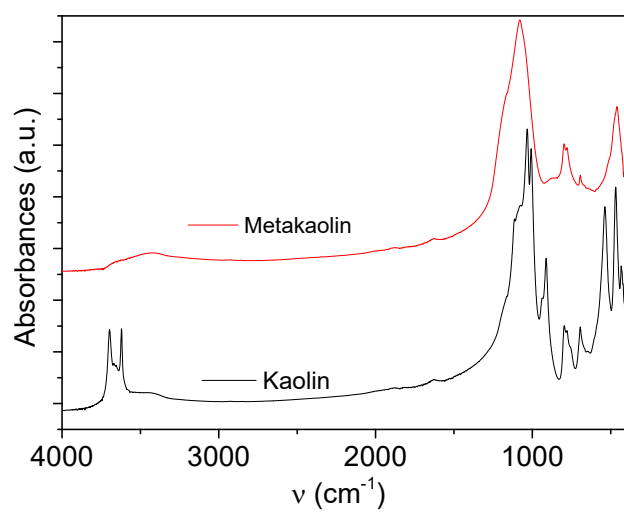

Figure S2. FTIR spectra of kaolin and metakaolin

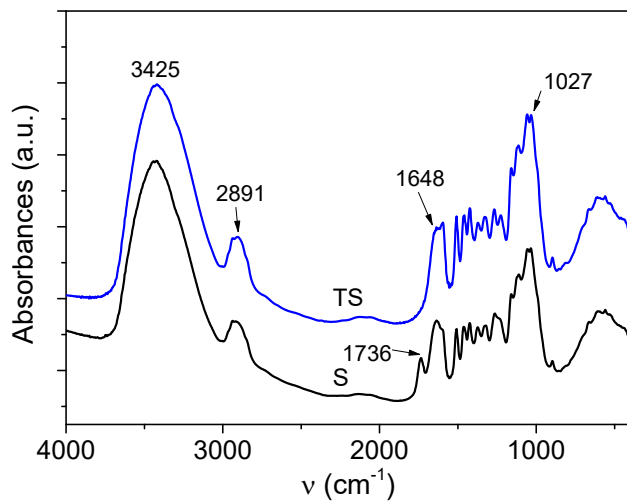

Figure S3. FTIR spectra of pristine and sodium hydroxide treated sawdust

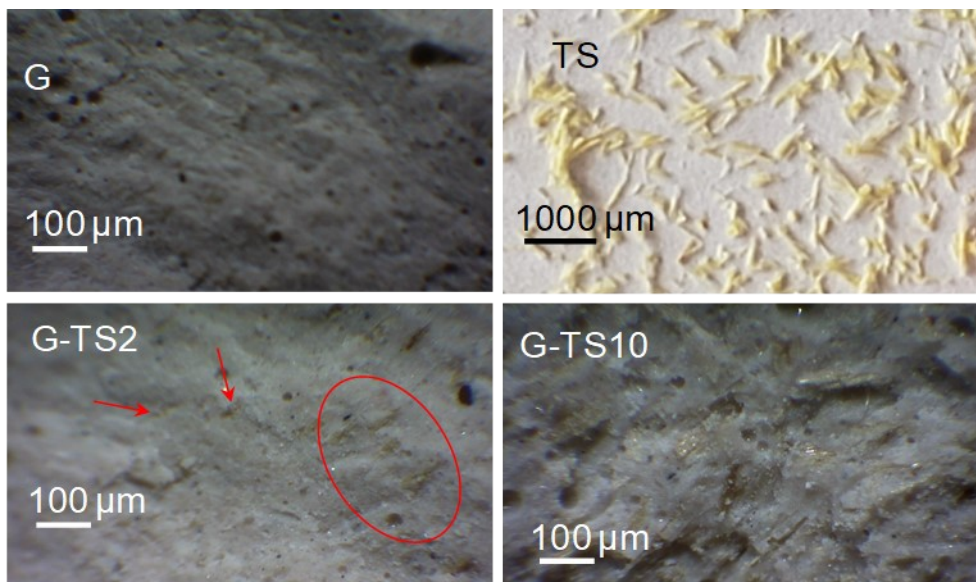

Figure S4. Optical microscope images of sodium hydroxide treated sawdust and composite materials

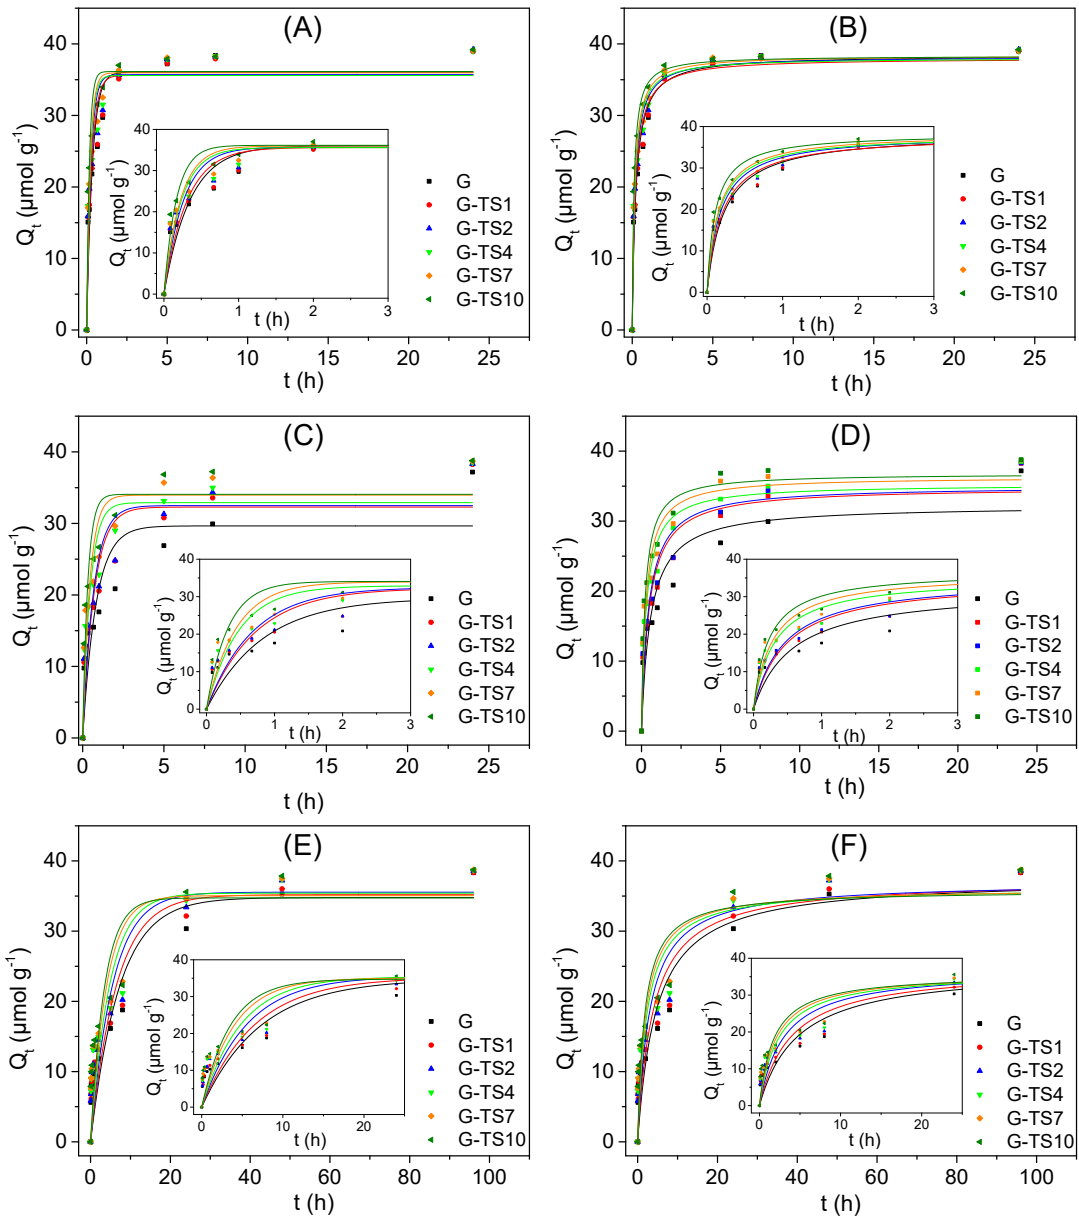

Figure S5. Non-linear fittings following pseudo-first order model for geopolymer-sawdust composites with particle sizes (A) 400  $\mu\text{m}$  -250  $\mu\text{m}$ , (C) 1000  $\mu\text{m}$  – 400  $\mu\text{m}$  and (E) 2000  $\mu\text{m}$  – 1000  $\mu\text{m}$ . Non-linear fittings following pseudo-second order model for geopolymer-sawdust composites with particle sizes (B) 400  $\mu\text{m}$  -250  $\mu\text{m}$ , (D) 1000  $\mu\text{m}$  – 400  $\mu\text{m}$  and (F) 2000  $\mu\text{m}$  – 1000  $\mu\text{m}$ .

Table S1. Pseudo-first and pseudo-second order kinetic model constants obtained from non-linear fittings of experimental data.

| Composites                              | Pseudo-first order |            |       |       | Pseudo-second order |                   |      |       |
|-----------------------------------------|--------------------|------------|-------|-------|---------------------|-------------------|------|-------|
|                                         | $Q_e$ (exp)        | $Q_e$ (th) | $K_1$ | $R^2$ | $Q_e$               | $10^1 \times K_2$ | $h$  | $R^2$ |
| 400 $\mu\text{m}$ -250 $\mu\text{m}$    |                    |            |       |       |                     |                   |      |       |
| G                                       | 37.19              | 36.05      | 2.88  | 0.77  | 38.43               | 1.17              | 173  | 0.97  |
| G-TS1                                   | 37.25              | 35.59      | 3.28  | 0.83  | 38.02               | 1.32              | 191  | 0.97  |
| G-TS2                                   | 37.84              | 35.70      | 3.87  | 0.83  | 38.22               | 1.51              | 221  | 0.97  |
| G-TS4                                   | 37.89              | 35.59      | 4.37  | 0.83  | 38.04               | 1.71              | 252  | 0.97  |
| G-TS7                                   | 38.08              | 35.96      | 4.57  | 0.83  | 38.38               | 1.78              | 262  | 0.98  |
| G-TS10                                  | 37.89              | 36.14      | 6.05  | 0.87  | 38.34               | 2.41              | 351  | 0.99  |
| 1000 $\mu\text{m}$ – 400 $\mu\text{m}$  |                    |            |       |       |                     |                   |      |       |
| G                                       | 37.40              | 29.65      | 1.21  | 0.77  | 32.24               | 0.54              | 56   | 0.87  |
| G-TS1                                   | 38.25              | 32.29      | 1.40  | 0.83  | 34.83               | 0.60              | 73   | 0.92  |
| G-TS2                                   | 38.32              | 32.50      | 1.49  | 0.83  | 35.03               | 0.64              | 79   | 0.92  |
| G-TS4                                   | 38.52              | 32.90      | 2.14  | 0.83  | 35.26               | 0.94              | 117  | 0.93  |
| G-TS7                                   | 38.72              | 33.95      | 2.31  | 0.84  | 36.33               | 0.99              | 145  | 0.93  |
| G-TS10                                  | 38.79              | 34.07      | 3.19  | 0.87  | 36.81               | 1.23              | 167  | 0.96  |
| 2000 $\mu\text{m}$ – 1000 $\mu\text{m}$ |                    |            |       |       |                     |                   |      |       |
| G                                       | 38.3               | 34.78      | 0.14  | 0.83  | 37.53               | 0.06              | 8    | 0.88  |
| G-TS1                                   | 38.32              | 35.18      | 0.15  | 0.83  | 37.33               | 0.07              | 10   | 0.88  |
| G-TS2                                   | 37.23              | 35.55      | 0.18  | 0.81  | 37.01               | 0.09              | 12   | 0.88  |
| G-TS4                                   | 37.35              | 35.41      | 0.20  | 0.76  | 36.27               | 0.12              | 16   | 0.84  |
| G-TS7                                   | 37.49              | 35.02      | 0.25  | 0.76  | 36.14               | 0.14              | 18   | 0.86  |
| G-TS10                                  | 37.86              | 34.73      | 0.29  | 0.73  | 35.84               | 0.16              | 20   | 0.84  |
| TS                                      | 308.98             | 299.37     | 18.41 | 0.95  | 318.58              | 0.86              | 8789 | 0.99  |

$Q_e$  (exp) and  $Q_e$  (th) ( $\mu\text{mol}^{-1} \text{g}$ ),  $K_1$  ( $\text{h}^{-1}$ ),  $K_2$  ( $\text{g} \mu\text{mol}^{-1} \text{h}^{-1}$ ),  $h$  ( $\mu\text{mol} \text{g}^{-1} \text{h}^{-1}$ ).

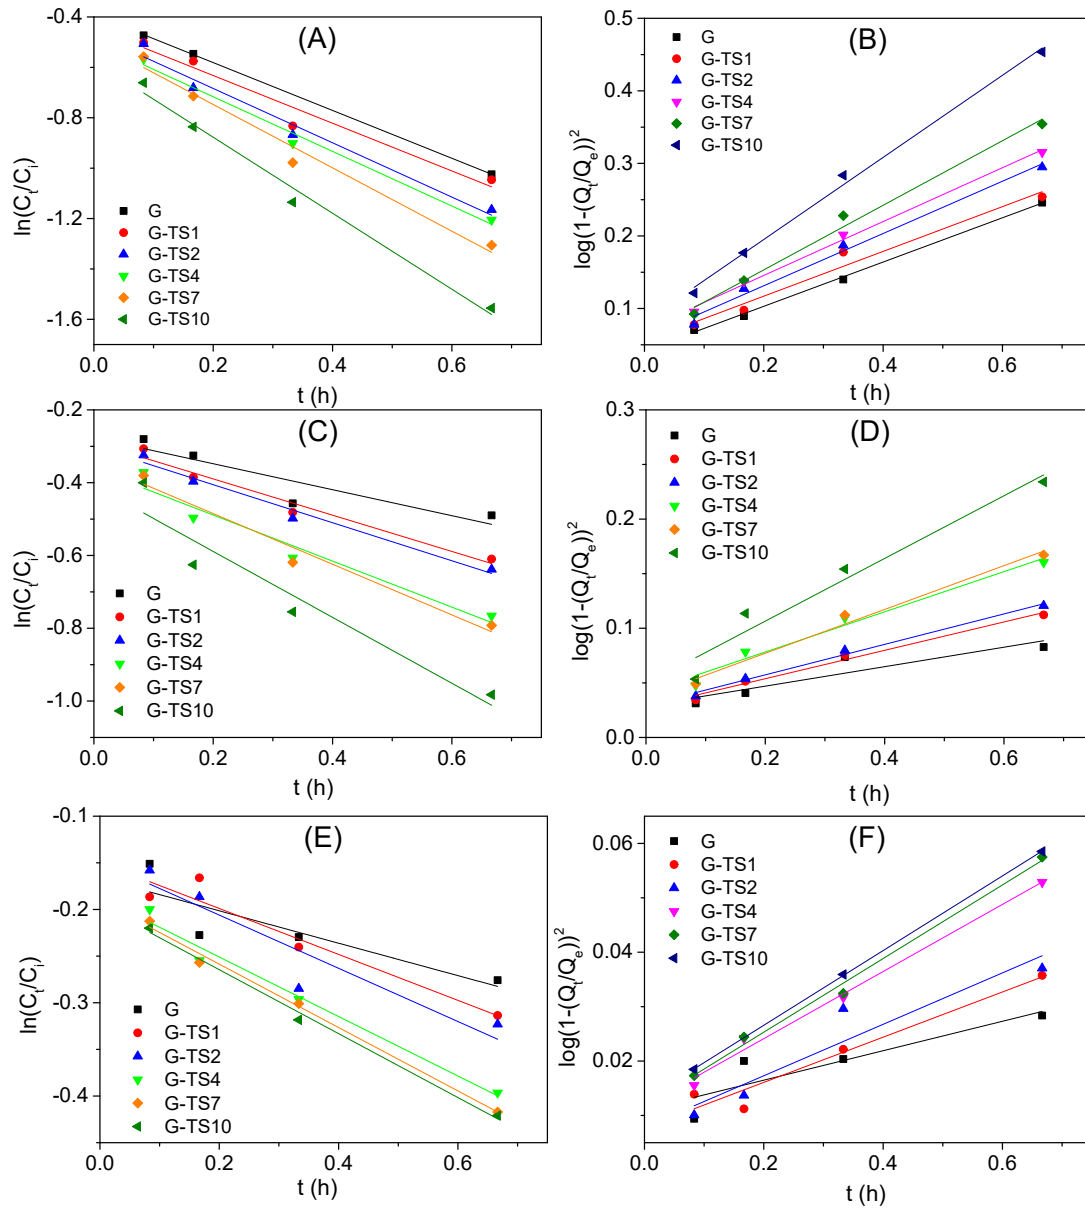

Figure S6. Plots of linear transformation of the external surface diffusion kinetic model for geopolymer-sawdust composites with particle sizes (A) 400  $\mu\text{m}$  -250  $\mu\text{m}$ , (C) 1000  $\mu\text{m}$  – 400  $\mu\text{m}$  and (E) 2000  $\mu\text{m}$  – 1000  $\mu\text{m}$ . Plots of linear transformation of the surface and internal diffusion model for geopolymer-sawdust with particle sizes (B) 400  $\mu\text{m}$  -250  $\mu\text{m}$ , (D) 1000  $\mu\text{m}$  – 400  $\mu\text{m}$  and (F) 2000  $\mu\text{m}$  – 1000  $\mu\text{m}$ .

Table S2. External surface diffusion model and surface and internal diffusion model constants obtained from fittings of experimental data.

|        | 400-250 $\mu\text{m}$ |       |       |       |       | 1000-400 $\mu\text{m}$ |       |       |       |       | 2000-1000 $\mu\text{m}$ |       |       |       |       |
|--------|-----------------------|-------|-------|-------|-------|------------------------|-------|-------|-------|-------|-------------------------|-------|-------|-------|-------|
|        | $k_f$                 | $R^2$ | D     | $R^2$ | $B_N$ | $k_f$                  | $R^2$ | D     | $R^2$ | $B_N$ | $k_f$                   | $R^2$ | D     | $R^2$ | $B_N$ |
| G      | 3.79                  | 0.99  | 5.22  | 0.99  | 25391 | 3.07                   | 0.74  | 7.08  | 0.76  | 30335 | 3.20                    | 0.62  | 9.86  | 0.70  | 48652 |
| G-TS1  | 3.58                  | 0.94  | 5.28  | 0.95  | 23729 | 4.06                   | 0.95  | 10.31 | 0.98  | 27544 | 4.30                    | 0.89  | 15.14 | 0.91  | 42577 |
| G-TS2  | 3.87                  | 0.96  | 6.17  | 0.98  | 22006 | 4.04                   | 0.96  | 11.07 | 0.98  | 25578 | 4.73                    | 0.81  | 17.23 | 0.85  | 41201 |
| G-TS4  | 3.55                  | 0.97  | 6.35  | 0.99  | 19554 | 4.46                   | 0.92  | 14.60 | 0.96  | 21380 | 4.82                    | 0.97  | 22.48 | 0.98  | 32140 |
| G-TS7  | 3.62                  | 0.96  | 7.61  | 0.98  | 16667 | 4.32                   | 0.93  | 15.91 | 0.97  | 19010 | 4.52                    | 0.99  | 24.66 | 0.99  | 27511 |
| G-TS10 | 3.89                  | 0.98  | 9.68  | 0.99  | 14061 | 5.03                   | 0.88  | 22.78 | 0.93  | 15453 | 4.08                    | 0.99  | 25.01 | 0.99  | 24461 |
| TS     | 17.64                 | 0.93  | 59.46 | 0.94  | 4452  |                        |       |       |       |       |                         |       |       |       |       |

D ( $10^{-9} \text{ cm}^2 \text{ s}^{-1}$ ) and  $k_f$  ( $10^{-3} \text{ cm s}^{-1}$ )

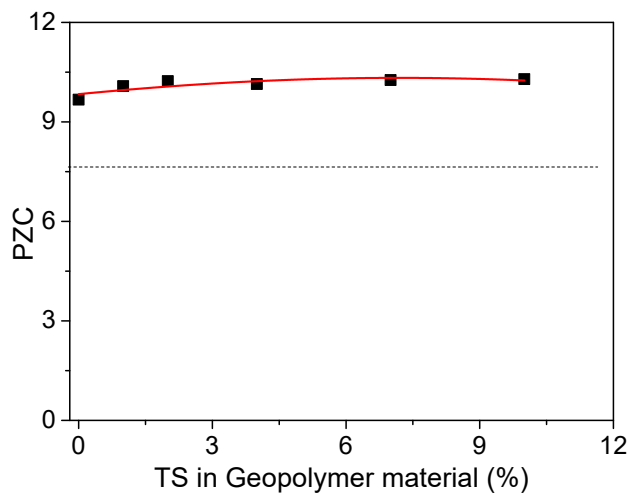

Figure S7. Point of zero charges of treated sawdust (Dotted line), Geopolymer and geopolymer-sawdust composites.
